# Supplementary material for: Scaling methods of leakage correction in GRACE mass change estimates revisited for the complex hydro-climatic setting of the Indus Basin
Source: Copernicus journal article supplement (doi:10.5194/hess-26-4515-2022), 2022-09-12
Supplement: Supplementary file 1 [file hess-26-4515-2022-supplement.zip]

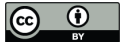

*Supplement of*

## **Scaling methods of leakage correction in GRACE mass change estimates revisited for the complex hydro-climatic setting of the Indus Basin**

**Vasaw Tripathi et al.**

*Correspondence to:* Martin Horwath ([martin.horwath@tu-dresden.de](mailto:martin.horwath@tu-dresden.de))

- [hess-26-4515-2022-supplement-title-page.pdf](#)
- [Data for time series and periodogram plots.xlsx](#)

The copyright of individual parts of the supplement might differ from the article licence.
