# Supplementary material for: Scaling methods of leakage correction in GRACE mass change estimates revisited for the complex hydro-climatic setting of the Indus Basin
Source: Copernicus journal article supplement (doi:10.5194/hess-26-4515-2022), 2022-09-12
Supplement: Supplementary file 2 [file hess-26-4515-2022-supplement.zip]

Archive with 2 entries (2 files):
- Data for time series and periodogram plots.xlsx
- hess-26-4515-2022-supplement-title-page.pdf
